# Supplementary material for: Tracking epigenetic histone modifications in single cells using Fab-based live endogenous modification labeling
Source: PubMed Central journal article supplement — Nucleic Acids Res. 2011 May 14;39(15):6475–88. doi: 10.1093/nar/gkr343 (PMC3159477; doi:10.1093/nar/gkr343), 2011-05-14
Supplement: supp_gkr343_suppl_data.pdf [file supp_gkr343_suppl_data.pdf]

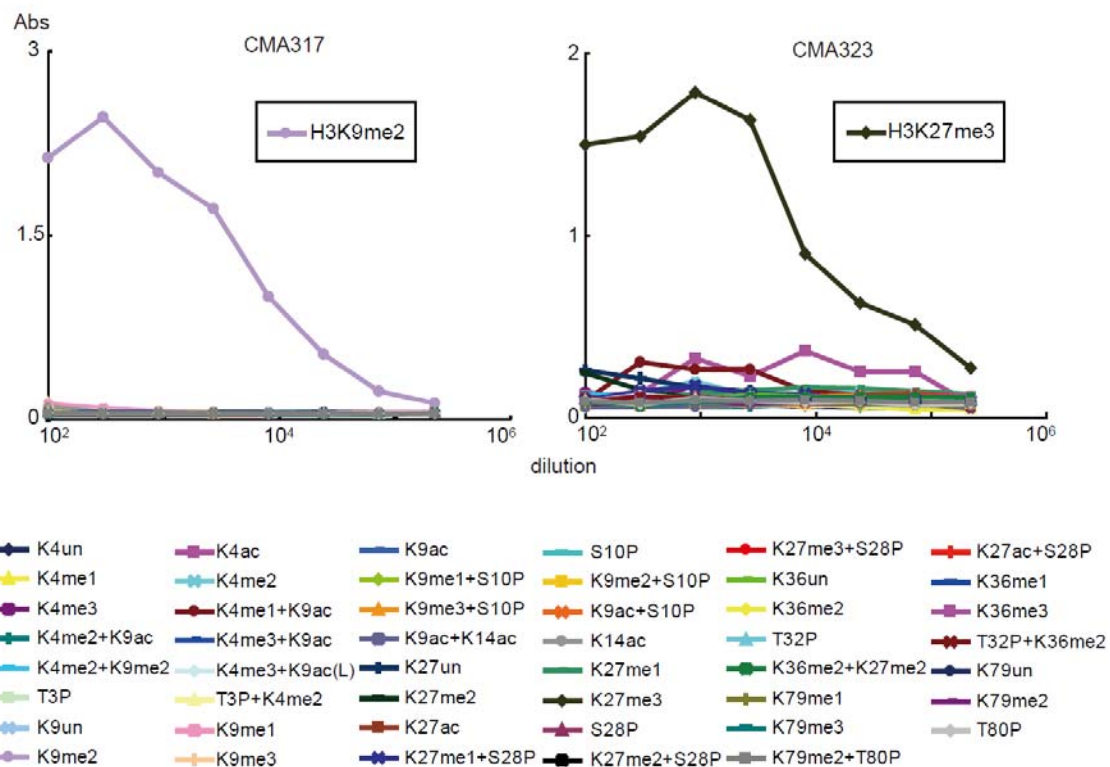

**Supplementary Figure S1.** The specificity of anti-H3K9me2 and anti-H3K27me3 evaluated by ELISA.

Microtiter plates coated with the peptides were incubated with 3-fold dilutions of each antibody, starting from 1:100 dilution of a hybridoma culture supernatant. After incubation with peroxidase-conjugated secondary antibody and washing, the colorimetric signal of tetramethylbenzidine was detected by measuring the absorbance at 405 nm (Abs) using a plate reader.

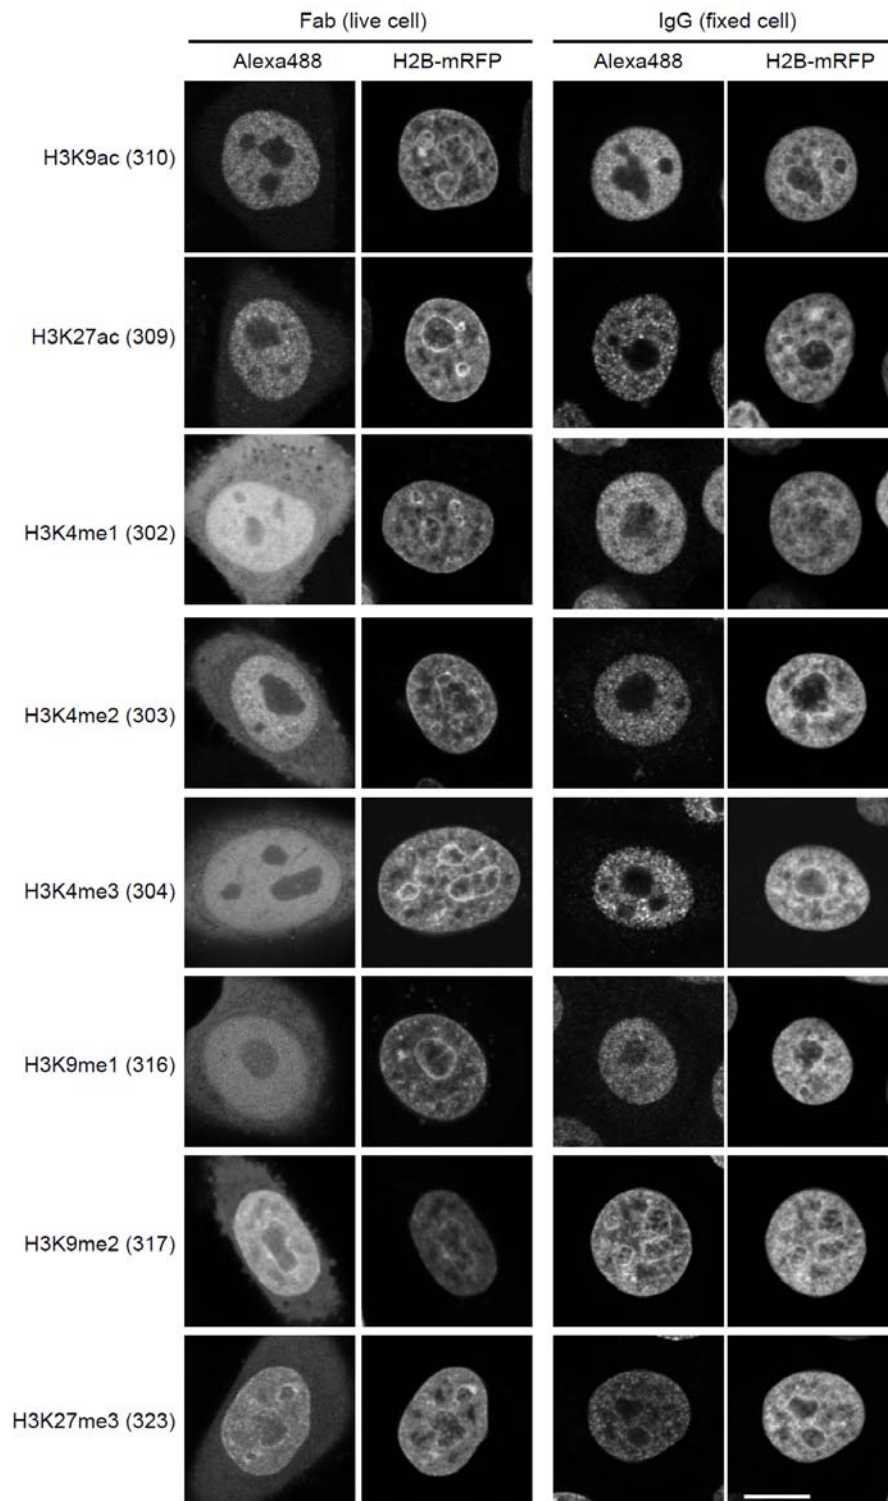

**Supplementary Figure S2.** Localization of histone H3 modifications in living cells probed with the specific Fabs.

HeLa cells expressing H2B-mRFP were loaded with Alexa488-labeled Fabs, or were fixed and stained with Alexa488-labeled IgG. Confocal images are shown. Bar, 10  $\mu$ m.

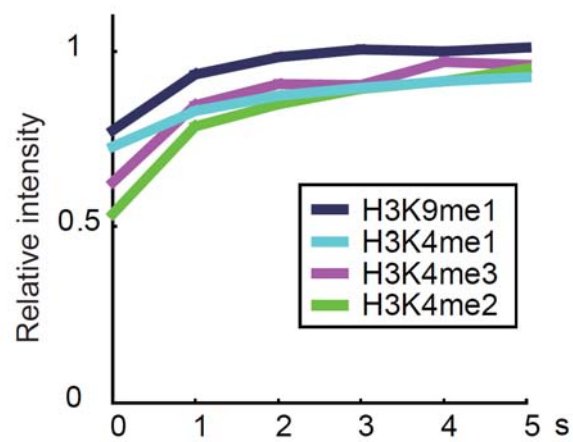

**Supplementary Figure S3. FRAP.**

The relative intensity of bleached area for the indicated Fabs is plotted (averages of > 10 cells). The data of FabH3K4me2 is represented from Figure 2 for comparison. The mobility of FabH3K9me1, FabH3K4me1 and FabH3K4me3 is faster than FabH3K4me2.



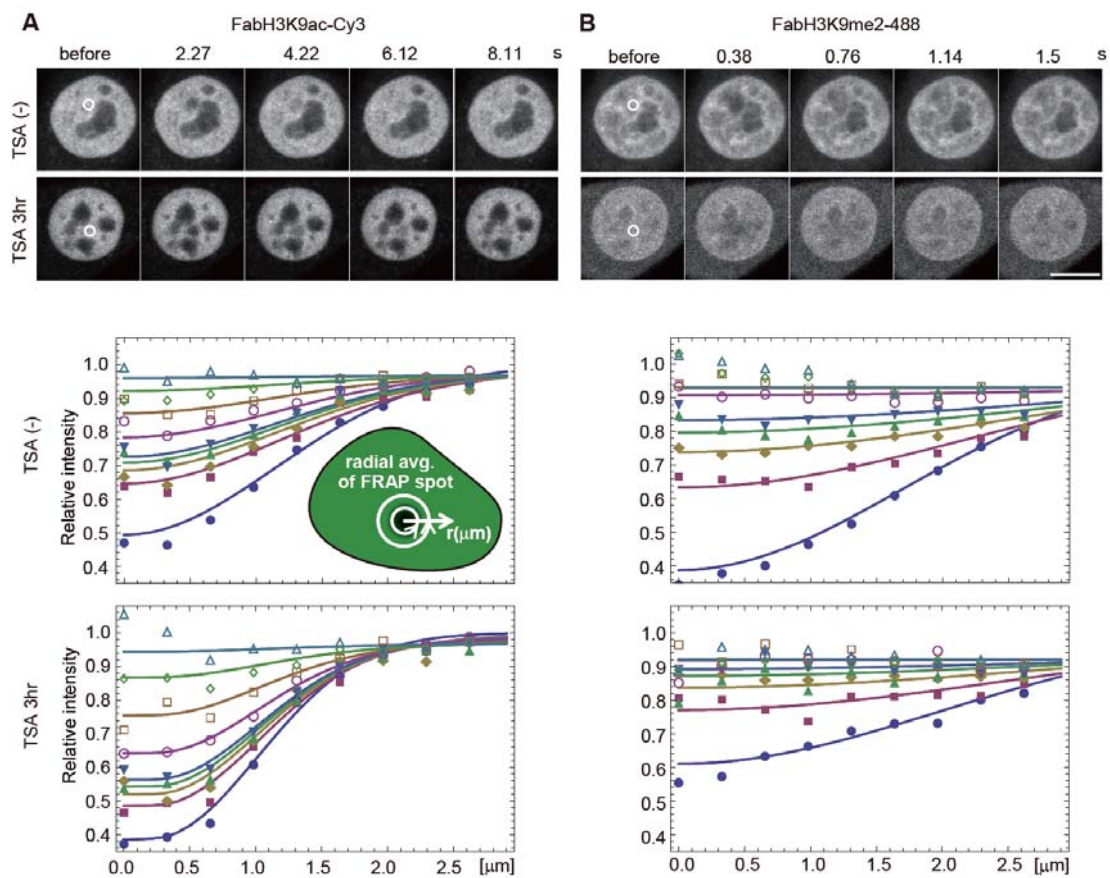

**Supplementary Figure S5.** FRAP analysis using a reaction-diffusion model.

HeLa cells were loaded with FabH3K9ac-Cy3 and FabH3K9me2-488, and a 2  $\mu\text{m}$  spot was bleached. The temporal evolution of the radial intensity profile of the bleach spot (see cartoon inset) was then fit using a reaction-diffusion model. From each fit, the average diffusion coefficient and binding association and residence times of Fabs were quantified, from which the bound/free fractions of Fabs were calculated (ref. 28). To quantify total binding, the pure-diffusion coefficient of each Fab was measured in the cytoplasm.

(A) Sample FRAP image sequences for FabH3K9ac-Cy3 are shown, along with a sample fit (solid colored lines) to the extracted data (colored shapes) below. From lowest to highest, data/lines correspond to times 0.38, 0.76, 1.14, 1.52, 1.90, 3.79, 7.58, and 27.67 s post-bleach. According to these fits, the bound/free fraction,  $t_{\text{on}}$  (s), and  $t_{\text{off}}$  (s) of FabH3K9ac-Cy3 is 12.2, 6.1, and 7.3, respectively, in the cell without TSA and 41.2, 4.0, and 9.0, respectively, with TSA.

(B) Same as (A), but for FabH3K9me2-488. According to these fits, the bound/free fraction of FabH3K9me2-488 is 7.6 in the cell without TSA and 5.2 with TSA. Bar, 10  $\mu\text{m}$ .

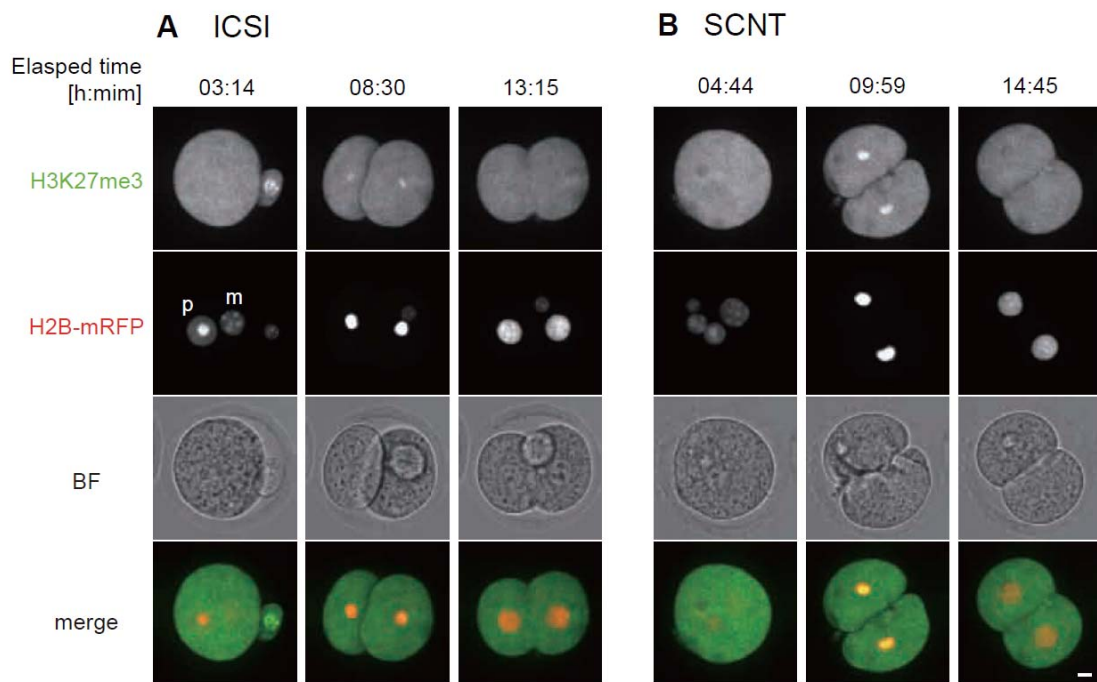

**Supplementary Figure S6.** Distribution of FabH3K27me3 in living mouse preimplantation embryos.

Time-lapse images were acquired for ICSI (**A**) and SCNT (**B**) embryos injected with FabH3K27me3-488. Typical images at the stages of zygote, the first anaphase and 2-cell are shown. Bar, 10  $\mu$ m.

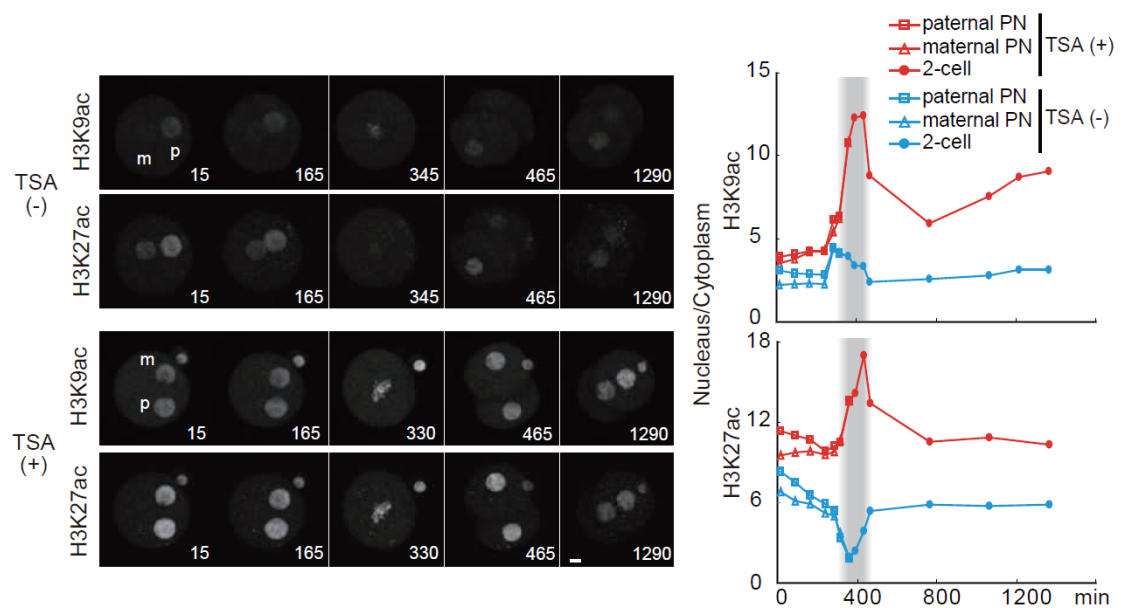

**Supplementary Figure S7.** Monitoring the levels of histone H3K9ac and H3K27ac in living mouse preimplantation embryos.

Time-lapse images were acquired for IVF embryos injected with FabH3K9ac-488 and FabH3K27ac-Cy3 in the absence or presence of TSA. Typical images are shown. The intensity ratio of nucleus to cytoplasm was measured and the averages ( $n > 10$ ) are plotted. Bar, 10  $\mu$ m.

## Legends to Supplementary Movies

**Movie 1.** IgGH3K9ac enters into the nucleus after cell division.

IgGH3K9ac-488 was loaded into the cytoplasm of HeLa cells. Phase-contrast (left) and fluorescence (right) images were captured every 30 min using an EM-CCD (iXon+; Andor) equipped with an inverted microscope (Ti-E; Nikon) with a Plan-Apochromat VC 100× NA 1.4 oil immersion objective lens. The time after the Fab loading (h:min) is indicated. Cytoplasmically loaded IgG was excluded from the nucleus until the breakdown of nuclear membrane in mitosis. Some still images are shown in Figure 1B. The display rate is 1.5 frames/s.

**Movie 2.** FabH3K9ac enters into the nucleus immediately.

FabH3K9ac-488 was loaded into the cytoplasm of HeLa cells. Phase-contrast (left) and fluorescence (right) images were captured every 5 min as in Movie 1. The time after the Fab loading (h:min) is indicated. Cytoplasmically loaded Fab diffused into the nucleus within minutes and became concentrated in the nucleus. Some still images are shown in Figure 1C. The display rate is 1.5 frames/s.

**Movie 3.** FabH3K9ac-loaded HeLa cells divide normally.

FabH3K9ac-488 was loaded into HeLa cells. Phase-contrast and fluorescence images were captured every 30 min as in Movie 1. The elapsed time from the start of acquisition (h:min) is indicated. FabH3K9ac-loaded and imaged cells went through a few cell divisions. Merged images are shown. Some still images are shown in Figure 1E. The display rate is 4.2 frames/s.

**Movie 4.** An inactive X chromosome replicates without dynamic repositioning in the nucleus.

FabH3K27me3-488 and PCNA-Cy3 were loaded into hTERT-RPE1 cells. Phase-contrast and fluorescence images were captured every 1 h as in Movie 1. The elapsed time from the start of acquisition (h:min) is indicated. Merged images of FabH3K27-488 (green) and PCNA-Cy3 (red) are shown. Some still images are shown in Figure 3E. The display rate is 2 frames/s.

**Movie 5.** Effect of TSA on FabH3K27ac nuclear concentration.

FabH3K27ac-488 was loaded into U2OS cells. Fluorescence images were captured every 15 min as in Movie 1. TSA (1  $\mu$ M) was added at time 0, and the



time before and after TSA addition is indicated (h:min). Pseudocolor images are shown. Some still images are shown in Figure 4B. The display rate is 1.5 frames/s.

**Movie 6.** Effect of TSA on FabH3K9ac and FabH3K9me2.

FabH3K9ac-Cy5, FabH3K9me2-488, and PCNA-Cy3 were loaded into HeLa cells. Fluorescence images were captured every 15 min as in Movie 1. TSA (3.3  $\mu$ M) was added at time 0, and the time before and after TSA addition is indicated (h:min). FabH3K9me2 (top left), FabH3K9ac (top right), PCNA (bottom left), and merged images (bottom right) are shown. Some still images are shown in Figure 4E. The display rate is 2 frames/s.

**Movie 7.** Reversibility of FabH3K9ac and FabH3K9me2 levels after TSA removal.

FabH3K9ac-Cy3 and FabH3K9me2-488 were loaded into HeLa cells. Fluorescence images were captured every 30 min as in Movie 1. TSA (3.3  $\mu$ M) was added at time 0, and 3 h later TSA was removed by washing 4 times with TSA-free medium. Cells were further incubated for 3 h in the absence of TSA. The time before and after TSA addition is indicated (h:min). FabH3K9ac (top left) and FabH3K9me2 (top right) are shown with phase-contrast (bottom right) and in merged images (bottom left; FabH3K9ac and FabH3K9me2 are shown in red and green, respectively). Some still images are shown in Figure 4I. The display rate is 2 frames/s.

**Movie 8.** FabH3K9ac in mouse IVF preimplantation embryos.

Mouse embryos were injected with H2B-mRFP mRNA and FabH3K9ac-488. Images of 51 focal planes (2- $\mu$ m intervals) were captured at 15-min intervals using an inverted microscope (IX-71) with a UPlan-Apochromat 20 $\times$  (NA = 0.8) oil immersion objective lens. Maximum projections of FabH3K9ac (top left) and H2B-mRFP (top right) are shown with bright-field (BF; bottom left) and in merged images (bottom right; FabH3K9ac and H2B-mRFP are shown in green and red, respectively). The elapsed time from the start of acquisition (h:min) is indicated. H2B-mRFP represents the distribution of chromatin. Some still images are shown in Figure 6C. The display rate is 10 frames/s.

**Movie 9.** FabH3K27ac in mouse IVF preimplantation embryos.

Mouse embryos were injected with H2B-mRFP mRNA and FabH3K27ac-488. Images were captured as in Movie 8. Maximum projections of FabH3K27ac (top left) and H2B-mRF (top right) are shown with bright-field (BF; bottom left) and in merged images (bottom right; FabH3K27ac and H2B-mRFP are shown in green and red, respectively). The elapsed time from the start of acquisition (h:min) is indicated. H2B-mRFP represents the distribution of chromatin. Some still images are shown in Figure 6E. The display rate is 10 frames/s.
